# Supplementary material for: Small nucleolar RNA SNORA71A promotes epithelial‐mesenchymal transition by maintaining ROCK2 mRNA stability in breast cancer
Source: Mol Oncol. 2022 Mar 30;16(9):1947–65. doi: 10.1002/1878-0261.13186 (PMC9067147; doi:10.1002/1878-0261.13186)
Supplement: Supplementary file 1 — Fig. S1. Establishment of EMT model in breast cancer cells. Fig. S2. Expression profiles of snoRNA in TGF‐β‐induced breast cancer cells. Fig. S3. SNORA71A promotes cell proliferation, migration, invasion and EMT in breast cancer cells. Fig. S4. SNORA71A inhibits cell apoptosis in breast cancer cells. Fig. S5. Effect of SNORA71A on cell proliferation and cell cycle. Fig. S6. The migration and invasion experiments were also conducted in the presence of aphidicolin (1mg/L). Fig. S7. Effect of SNORA71A siRNA‐2 on migration, invasion and EMT. Fig. S8. Deficiency of SNORA71A abrogated the promote effect of TGF‐β on EMT. Fig. S9. ROCK2 promotes the migration and invasion of breast cancer cells. Fig. S10. ROCK2 overexpression significantly blocked the silencing of SNORA71A to enhance the proliferation of breast cancer cells. Fig. S11. Silencing of ROCK2 blocks the increased effect of SNORA71A in cell proliferation, migration, invasion and EMT of MDA‐MB‐231 cells. Table S1. Clinical features of breast cancer patients, and the correlationship between SNORA71A expression and different clinical features. Table S2. Primer and siRNA sequences used in this study. Table S3. Statistic analysis ofreads and base from snoRNA sequencing data. Table S4. Mapping statistics of snoRNA from small RNA sequencing data. Table S5. The commonly upregulated and downregulated snoRNA in both two breast cancer cells. Table S6. Mass spectrometry of SNORA71A pull down product. The“Entry name” shows theproteins may bind to SNORA71A. [file MOL2-16-1947-s001.pdf]

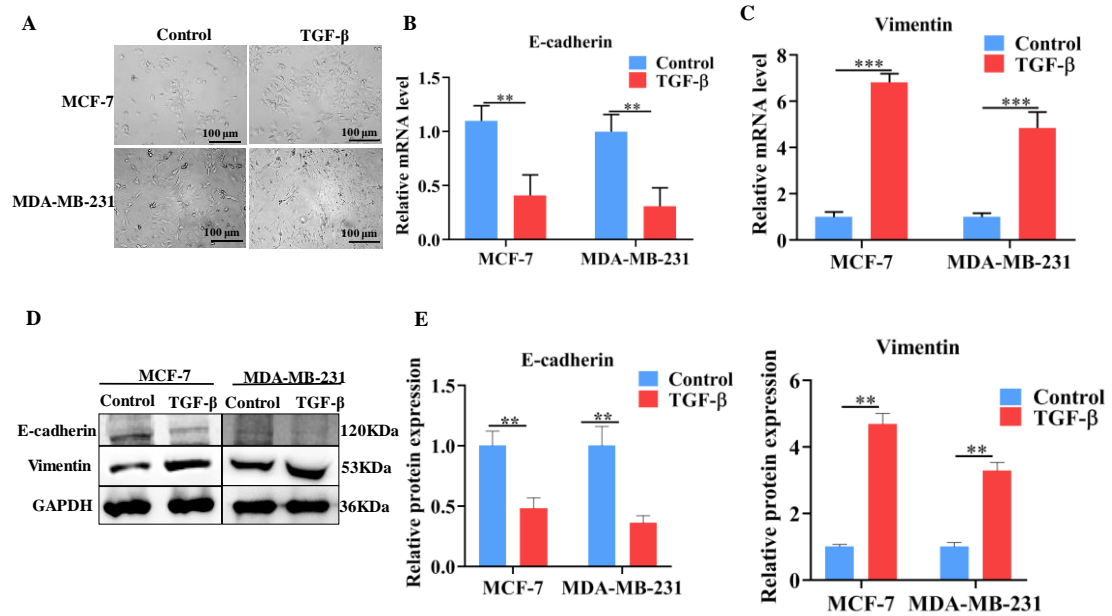

**Figure S1 Establishment of EMT model in breast cancer cells.** **A.** Morphology of MCF-7 and MDA-MB-231 cells treated with TGF- $\beta$  for 48 h. **B.** The mRNA expression of E-cadherin was detected by real-time PCR. **C.** The mRNA expression of Vimentin was detected by real-time PCR. **D.** The protein levels of Vimentin and E-cadherin were detected by western blotting. Each experiment was performed in triplicate. **E.** The protein level in Fig D was analyzed by ImageJ software. Error was defined as SD, t-test, \*\* $p < 0.01$ , \*\*\* $p < 0.001$ .

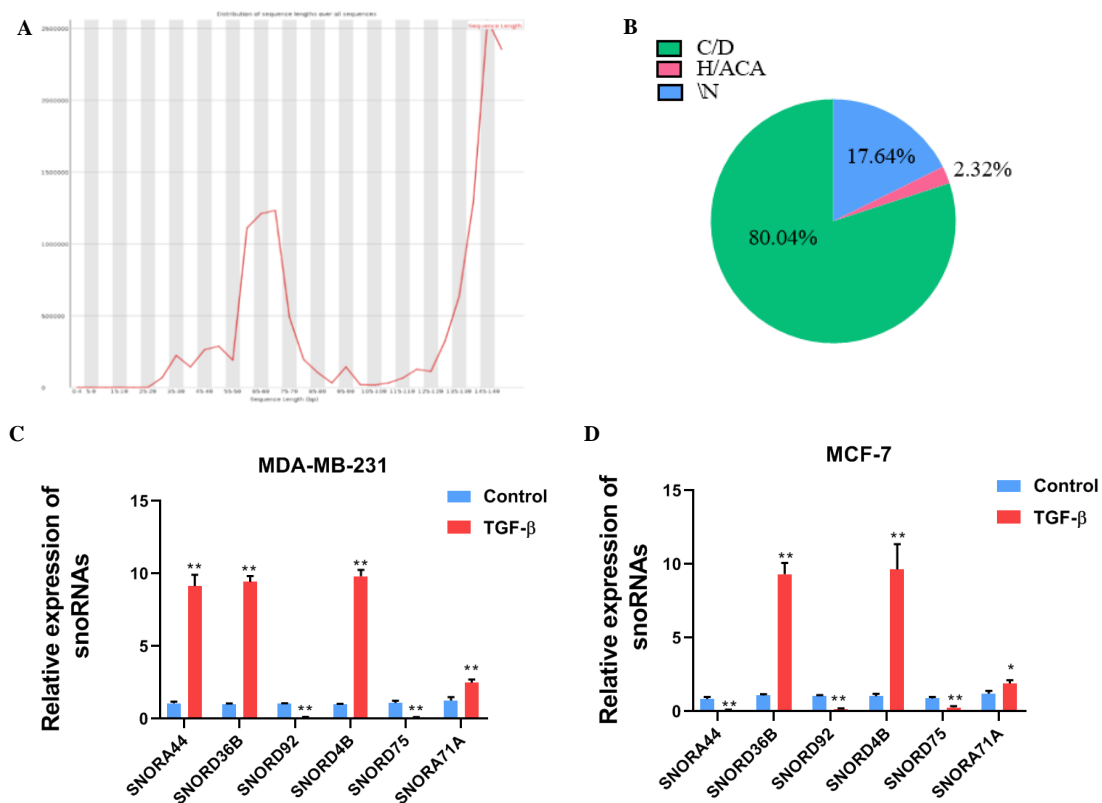

**Figure S2 Expression profiles of snoRNA in TGF- $\beta$ -induced breast cancer cells.** snoRNA sequencing was performed in TGF- $\beta$ -induced MCF-7 and MDA-MB-231 cells and their control cells. **A.** The length distribution of snoRNA. **B.** Classification of snoRNAs in breast cancer cells. **C and D.** Six snoRNAs that differentially expressed in both cell lines were verified by real time PCR. Error was defined as SD, n=3, t-test. \*p<0.05, \*\*p<0.01.

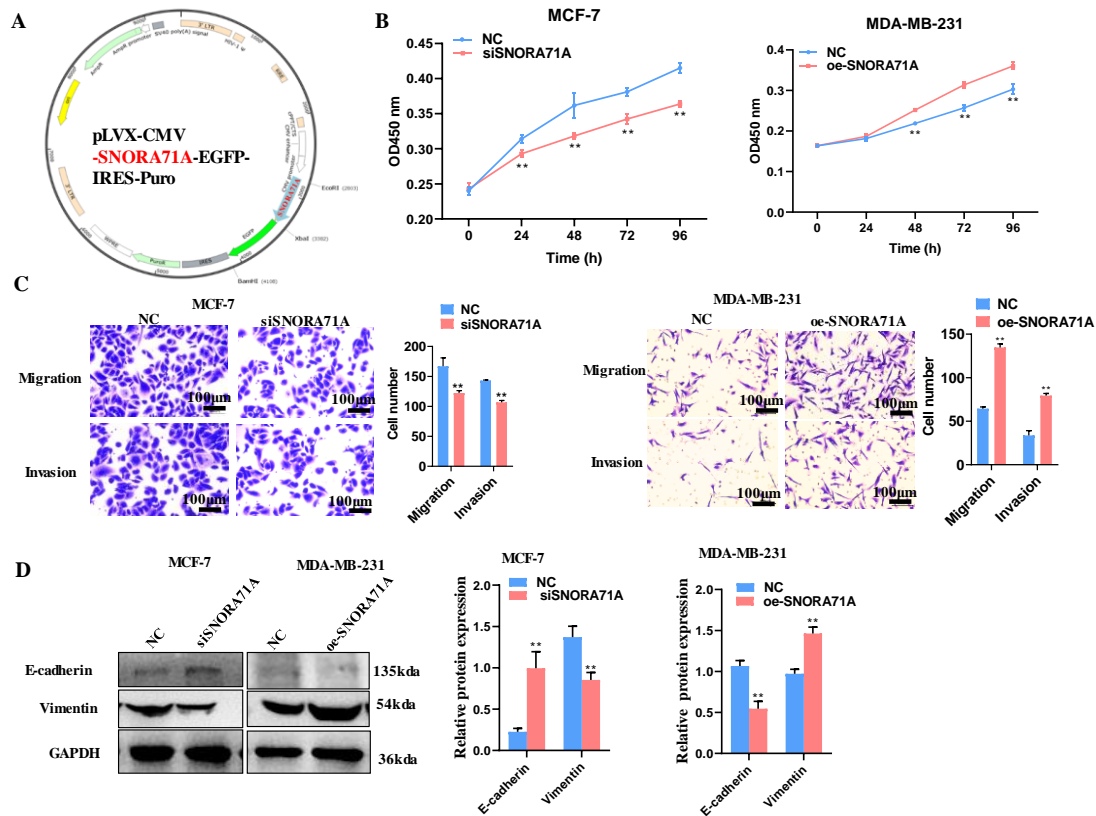

**Figure S3 *SNORA71A* promotes cell proliferation, migration, invasion and EMT in breast cancer cells.** **A.** Overexpression of *SNORA71A* was obtained by pLVX-CMV-EGFP-IRES-Puro vector using EcoRI(GAATTC)-XbaI(TCTAGA) cloning sites. **B.** The effect of *SNORA71A* silencing on MCF-7 cell proliferation and *SNORA71A* overexpression on MDA-MB-231 cell proliferation was performed by CCK-8. NC for silencing was transfected with si-control, NC for *SNORA71A* overexpression was transfected with empty vector for 48h. n=6, T-test. \*\*p<0.01. **C.** The effect of *SNORA71A* silencing and overexpression on migration and invasion was performed in MCF-7 and MDA-MB-231 cells by transwell. Scale bar=100μm. n=3, T-test. \*\*p<0.01. **D.** The effect of *SNORA71A* on the expression of the EMT marker was detected by western blotting after transfection for 48h (three biological replicates). NC for silencing was cells transfected with si-control, NC for *SNORA71A* overexpression was cells transfected with empty vector. Error was defined as SD, t-test. \*\*p<0.01.

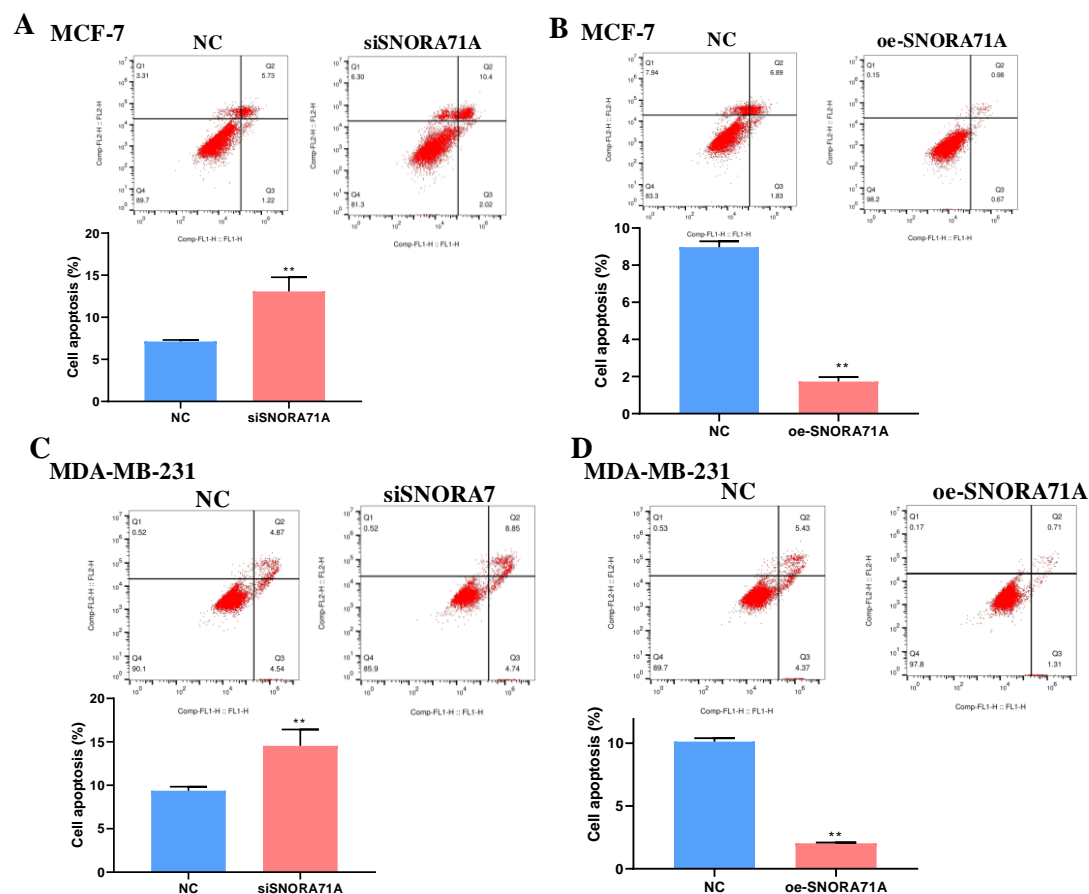

**Figure S4 *SNORA71A* inhibits cell apoptosis in breast cancer cells. A-D.** Effect of *SNORA71A* on cell apoptosis was performed by flow cytometer. MCF-7 and MDA-MB-231 cells were transfected with si-control, siSNORA71A, empty vector or LVX-*SNORA71A* vector for 48h. NC in figure S4 A and C: cells were transfected with si-control. NC in figure S4 B and D: cells were transfected with empty vector. Error was defined as SD, n=3, t-test, \*\*p<0.01.

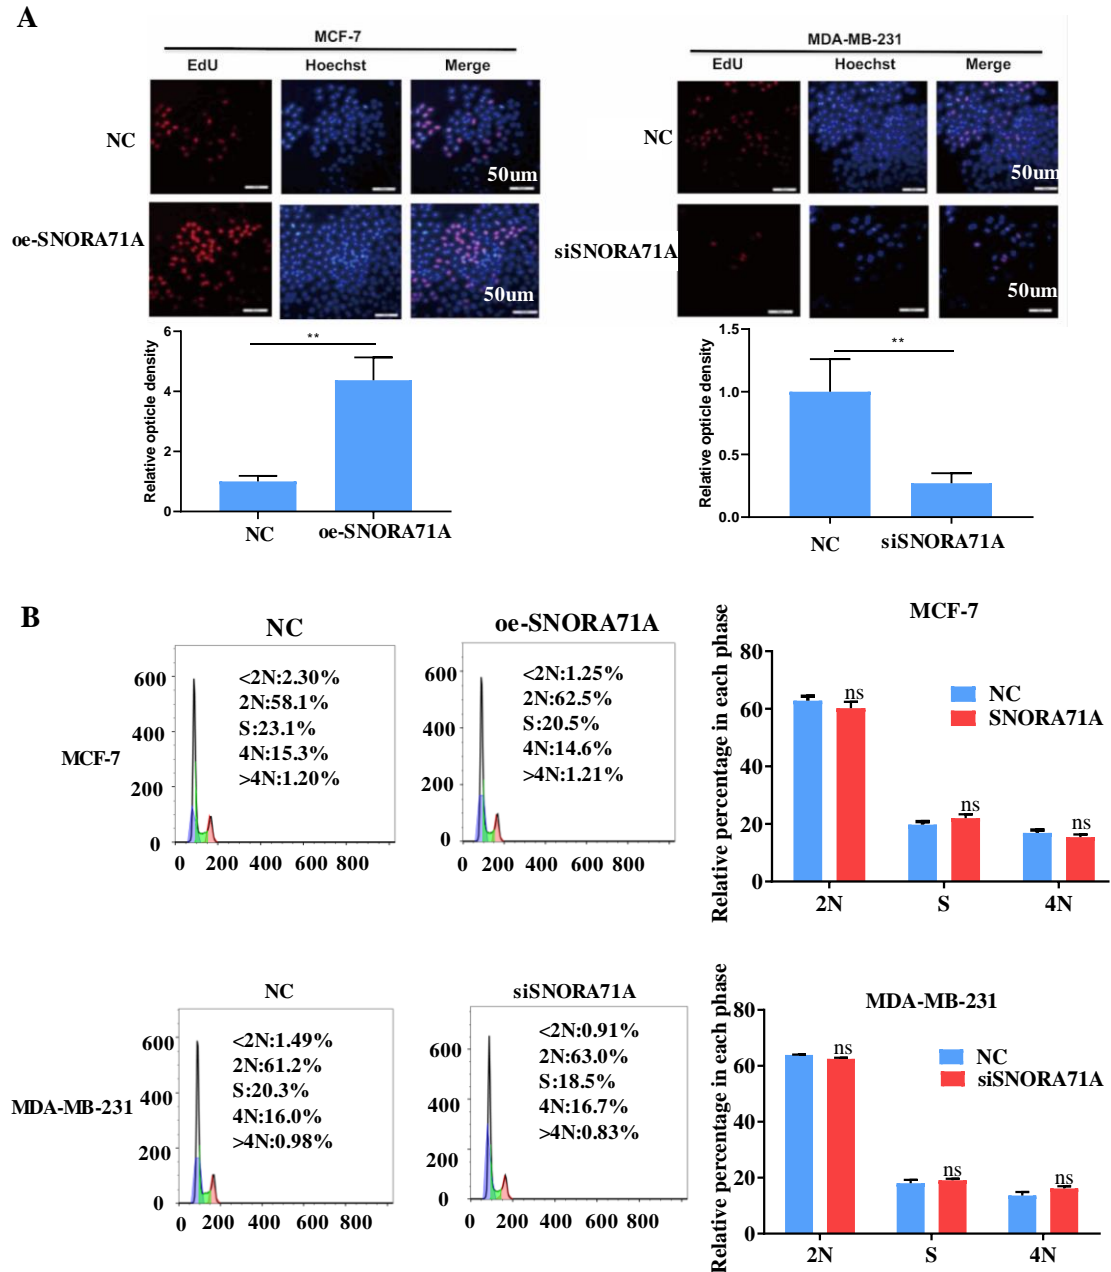

**Figure S5 Effect of *SNORA71A* on cell proliferation and cell cycle.** **A.** Cell proliferation was analyzed by immunofluorescence analysis with Edu after transfection for 48h. NC for *SNORA71A* overexpression: cells were transfected with empty vector. NC for *SNORA71A* silencing: cells were transfected with si-control. Scale bar=50µm. n=3, t-test, \*\*p<0.05. **B.** The effect of *SNORA71A* on the cell cycle after transfection for 48h. NC for *SNORA71A* overexpression: cells were transfected with empty vector. NC for *SNORA71A* silencing: cells were transfected with si-control. Error was defined as SD, n=3, t-test, ns: no significant.

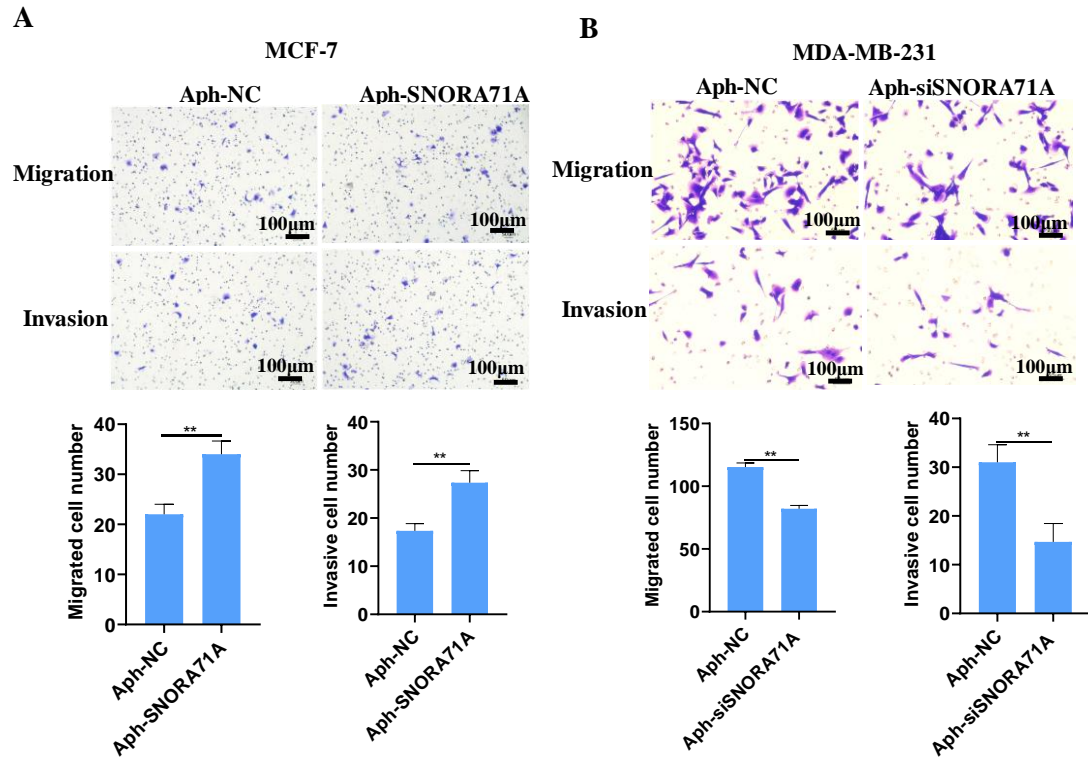

**Figure S6** The migration and invasion experiments were also conducted in the presence of aphidicolin (1mg/L). **A.** The effect of *SNORA71A* overexpression on migration and invasion in the presence of aphidicolin (1mg/L) was detected by transwell assay, in MCF-7 cells. Aph-NC: transfected with vector. Scale bar=100µm. **B.** The effect of *SNORA71A* silencing on migration and invasion in the presence of aphidicolin (1mg/L) was detected by transwell assay, in MDA-MB-231 cells. Aph-NC: transfected with si-control. Scale bar=100µm. Error was defined as SD, t-test, \*\*p<0.01.

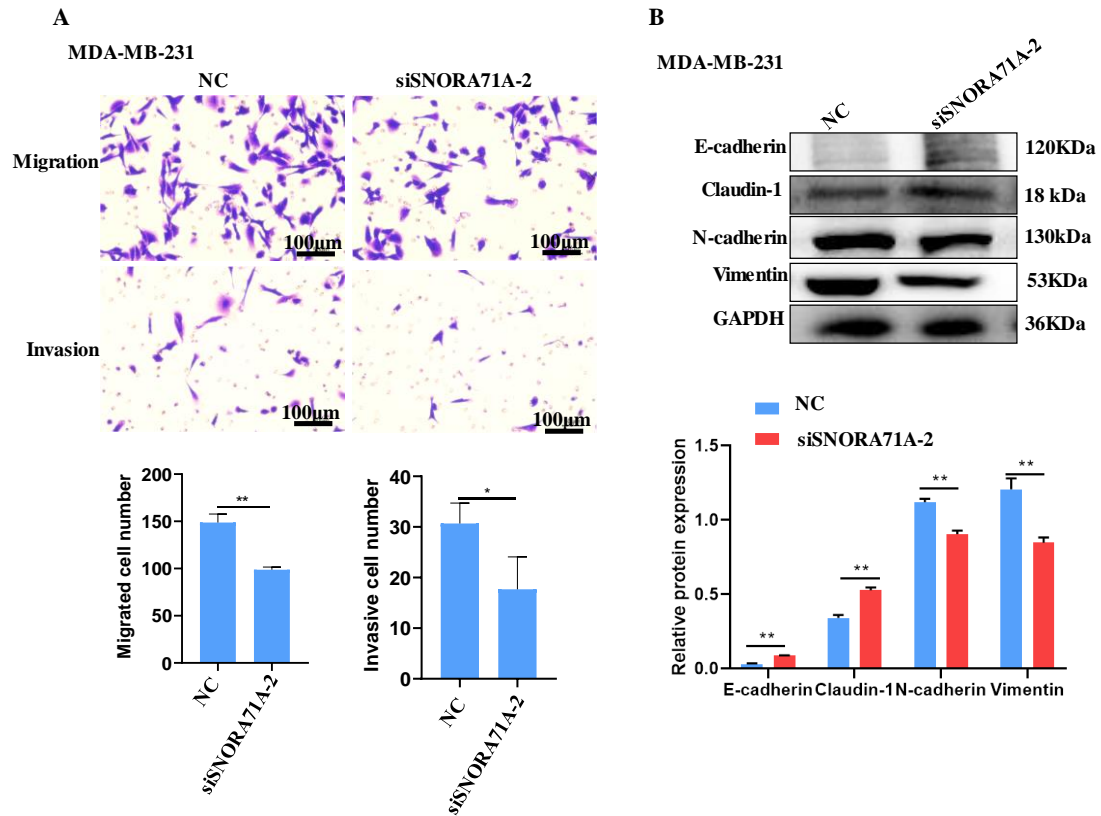

**Figure S7 Effect of *SNORA71A* siRNA-2 on migration, invasion and EMT.** **A.** The effect of *SNORA71A* siRNA-2 on migration and invasion was detected by transwell assay in MDA-MB-231 cells. Scale bar=100μm. **B.** The effect of *SNORA71A* siRNA-2 on EMT was detected by transwell assay in MDA-MB-231 cells. NC: cells were transfected with si-control. Error was defined as SD, t-test, \* $p < 0.05$ , \*\* $p < 0.01$ .

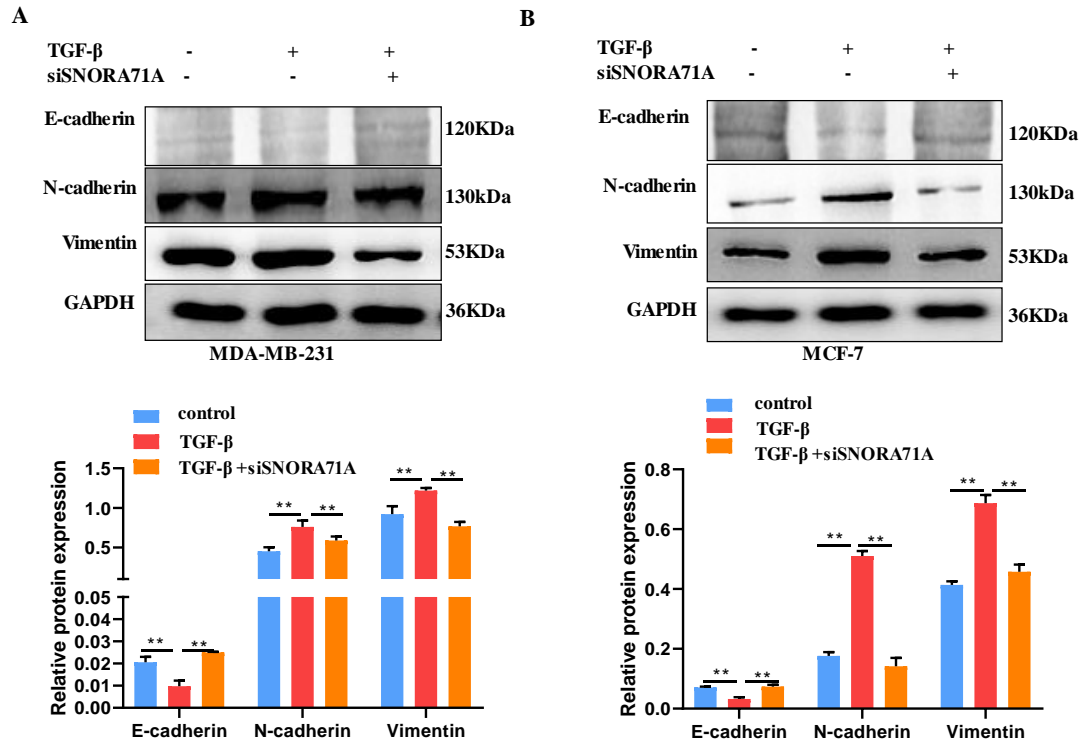

**Figure S8 Deficiency of *SNORA71A* abrogated the promote effect of TGF- $\beta$  on EMT. A.** The expression of epithelial marker E-cadherin, and mesenchymal marker N-cadherin and Vimentin in MDA-MB-231 cells was detected by western blot. **B.** The expression of epithelial marker E-cadherin, and mesenchymal marker N-cadherin and Vimentin in MCF-7 cells was detected by western blot. Control: cells without any treatment. TGF- $\beta$ : cells were only treated with TGF- $\beta$  for 48 h, and without si-control transfected. TGF- $\beta$ +siSNORA71A: cells were transfected with siSNORA71A and treated with TGF- $\beta$  for 48 h. Error was defined as SD, n=3, one-way ANOVA. \*\* p<0.01.

### MDA-MB-231

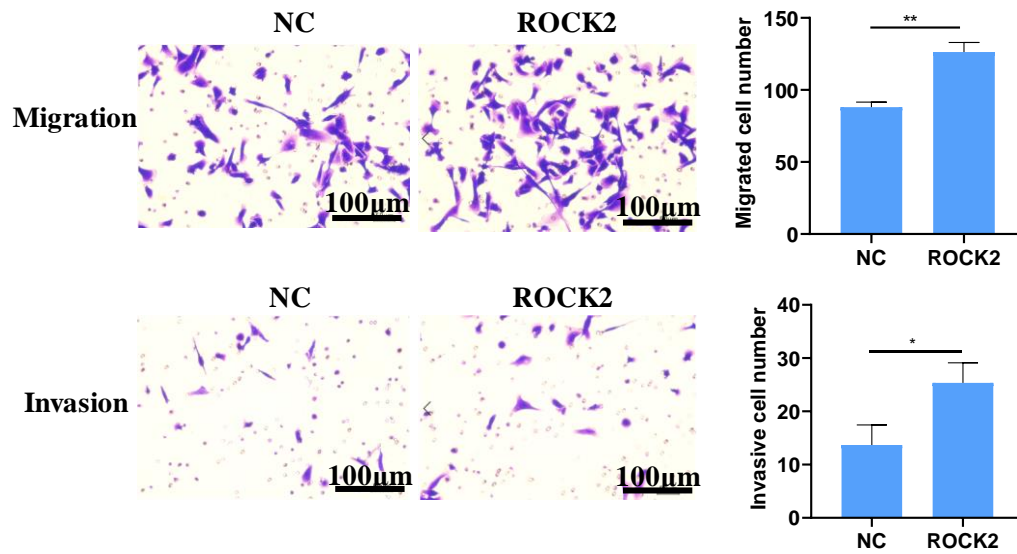

**Figure S9** *ROCK2* promotes the migration and invasion of breast cancer cells.

The migration and invasion was measured by transwell. NC: MDA-MB-231 cells were transfected with empty vector. ROCK2: MDA-MB-231 cells were transfected with ROCK2-overexpressed vector for 48h. Scale bar=100 $\mu$ m. Error was defined as SD, n=3, t-test, \* $p < 0.05$ , \*\* $p < 0.01$ .

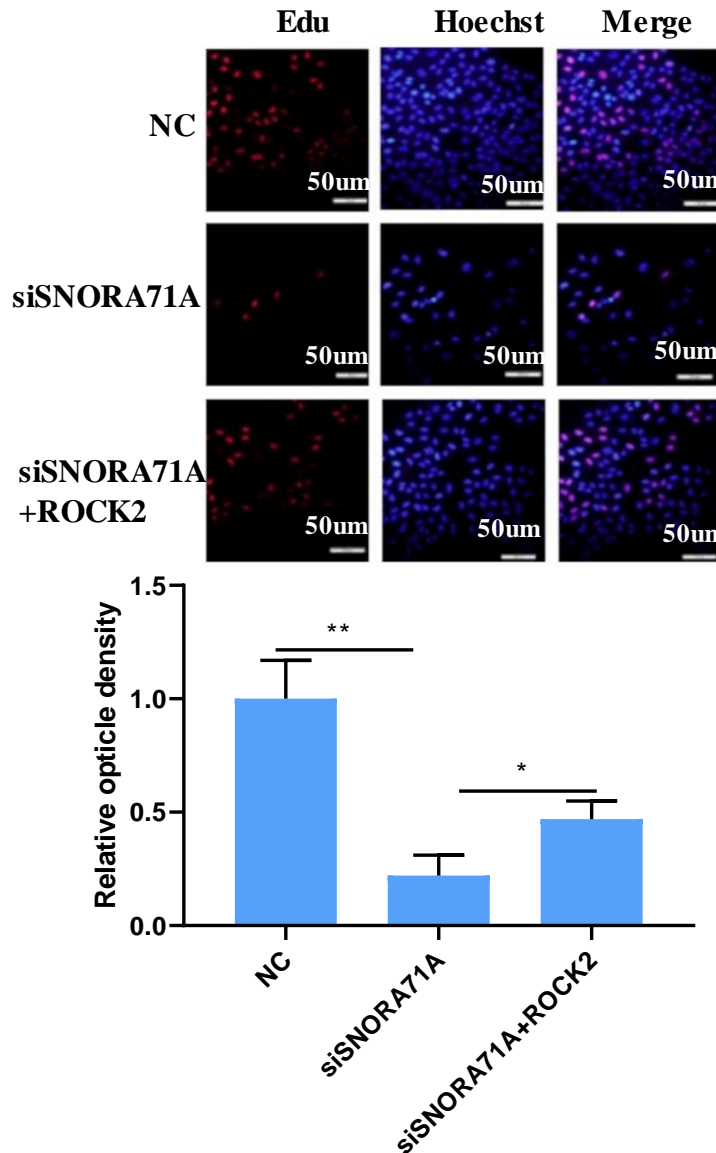

**Figure S10** *ROCK2* overexpression significantly blocked the silencing of *SNORA71A* to enhance the proliferation of breast cancer cells. Cell proliferation was analyzed by immunofluorescence analysis with Edu in MDA-MB-231 cells. NC: cells were transfected with si-control. siSNORA71A: cells were transfected with siSNORA71A. siSNORA71A + ROCK2: cells were co-transfected with siSNORA71A and *ROCK2*-overexpressed vector for 48h. Scale bar=50 μm. Error was defined as SD, n=3, one way-ANOVA, \*p<0.05, \*\*p<0.01.

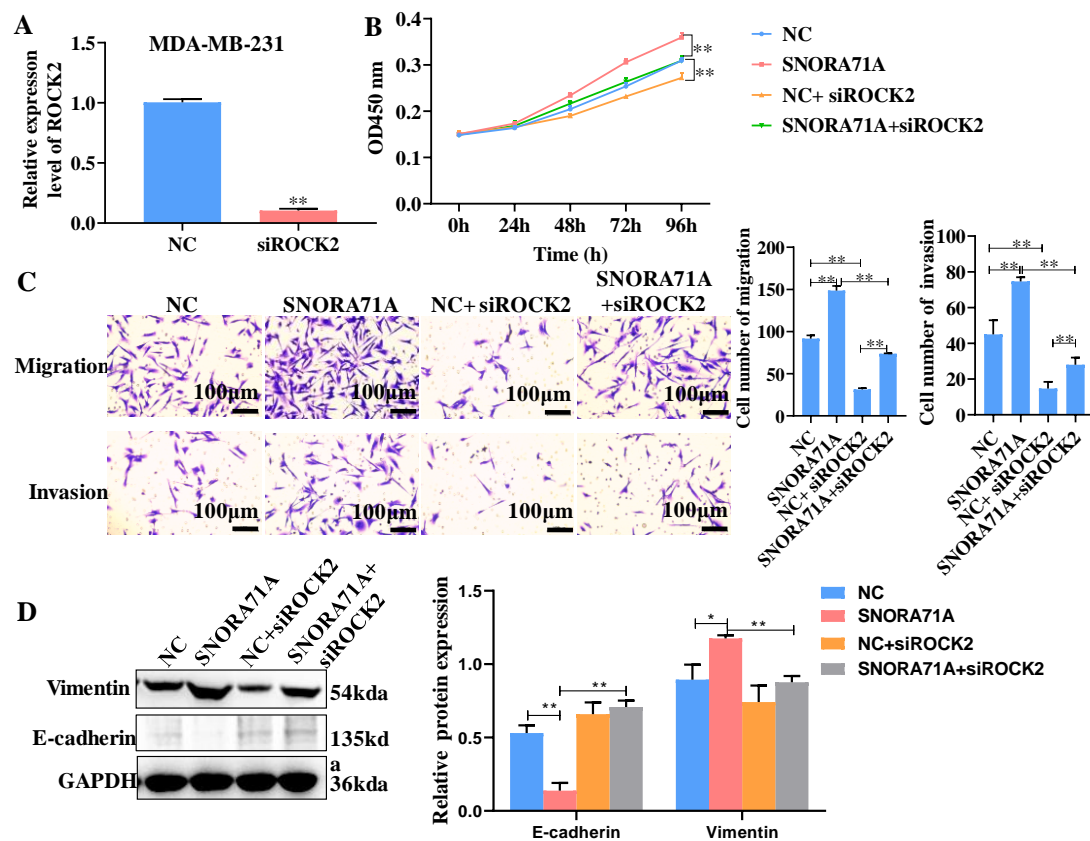

**Figure S11 Silencing of *ROCK2* blocks the increased effect of *SNORA71A* in cell proliferation, migration, invasion and EMT of MDA-MB-231 cells.** **A.** Silencing efficiency of *ROCK2* in MDA-MB-231 cells was verified by real time PCR. Cells were transfected for 24h. NC: cells were transfected with si-control. n=3, t-test, \*\*p<0.01. **B.** Cell proliferation was analyzed by CCK-8. MDA-MB-231 cells were transfected with empty vector (NC), *SNORA71A*-overexpressed vector, si-control, or co-transfected with *SNORA71A*-overexpressed vector and siROCK2. n=6, one way-ANOVA, \*\*p<0.01. **C.** Cell migration and invasion were measured by transwell. MDA-MB-231 cells were transfected with empty vector (NC), *SNORA71A*-overexpressed vector, si-control, or co-transfected with *SNORA71A*-overexpressed vector and siROCK2 for 48h. Scale bar=100μm. n=3, one way-ANOVA, \*\*p<0.01. **D.** EMT biomarkers were detected by western blot after transfected for 48h. NC: cells were transfected with empty vector. Error was defined as SD, n=3, one way-ANOVA, \*p<0.05, \*\*p<0.01.

Table S1 Clinical features of breast cancer patients, and the correlation between *SNORA71A* expression and different clinical features.

|                       | Hight | Low | x2              | p               |
|-----------------------|-------|-----|-----------------|-----------------|
| Age                   |       |     |                 |                 |
| <=60                  | 11    | 11  | <b>0.832579</b> | <b>0.361528</b> |
| >60                   | 9     | 8   |                 |                 |
| Tumor grade           |       |     |                 |                 |
| High + middle         | 10    | 7   | <b>0.255275</b> | <b>0.613385</b> |
| Low                   | 10    | 12  |                 |                 |
| Stage                 |       |     |                 |                 |
| I-II                  | 5     | 14  | <b>7.397644</b> | <b>0.006531</b> |
| III-IV                | 15    | 5   |                 |                 |
| ER status             |       |     |                 |                 |
| Positive              | 4     | 14  | <b>9.242340</b> | <b>0.002365</b> |
| Negative              | 16    | 5   |                 |                 |
| PR status             |       |     |                 |                 |
| Positive              | 7     | 12  | <b>2.067824</b> | <b>0.150436</b> |
| Negative              | 13    | 7   |                 |                 |
| HER-2 status          |       |     |                 |                 |
| Positive              | 11    | 7   | <b>0.665273</b> | <b>0.414705</b> |
| Negative              | 9     | 12  |                 |                 |
| Lymph node metastasis |       |     |                 |                 |
| Yes                   | 15    | 7   | <b>4.322120</b> | <b>0.037620</b> |
| No                    | 5     | 12  |                 |                 |

Table S2 Primer and siRNA sequences used in this study.

| Gene name            | Primer sequence                                                                 |
|----------------------|---------------------------------------------------------------------------------|
| <i>SNORA71A</i>      | F: 5'- AGGGAGAGGAACGCTGAAAGAG -3'<br>R: 5'- TCGGATGGGATAGGGTGGGA -3'            |
| <i>c-myc</i>         | F: 5'- CCGCTTCTCTGAAAGGCTCTC -3'<br>R: 5'- TCCTCCTCGTCGCAGTAGAAATA -3'          |
| <i>ROCK1</i>         | F: 5'- TAACAGAACTAGCTCCAATGCAGAT -3'<br>R: 5'- GGTTCTGCACTTCTGCTCCATT -3'       |
| <i>ROCK2</i>         | F: 5'- GCAGAAGTGGGTTAGTCGGTTG -3'<br>R: 5'- GGCAGTTAGCTAGGTTTGTGTTGG -3'        |
| <i>MAPK1</i>         | F: 5'- GGAGCAGTATTACGACCCGAGT -3'<br>R: 5'- CTTTTCCTTAGGCAAGTCATCCA -3'         |
| <i>SMAD3</i>         | F: 5'- GGAGGAGAAATGGTGCGAGAA -3'<br>R: 5'- CACAGGCGGCAGTAGATGACA -3'            |
| <i>GAPDH</i>         | F: 5'- AGAAGGCTGGGGCTCATT -3'<br>R: 5'- TGCTAAGCAGTTGGTGGTG -3'                 |
| <i>SNORA71A</i> -siR | Sense: 5'- CCUGCAUCCGAAAGUGAUCTT -3'                                            |
| NA-3                 | Antisense: 5'- GAUCACUUUCGGAUGCAGGTT-3'                                         |
| <i>SNORA71A</i> -siR | Sense: 5'- GCCUAGGUCAUUGAUAGUGTT -3'                                            |
| NA-35                | Antisense: 5'- CACUAUCAAUGACCUAGGCTT -3'                                        |
| siRNA NC             | Sense: 5'-UUCUCCGAACGUGUCACGUTT -3'<br>Antisense : 5'-ACGUGACACGUUCGGAGAATT -3' |

Table S3 Statistic analysis of reads and base from snoRNA sequencing data.

| SampleName          | TotalReads_Before | TotalBase_Before | TotalReads_After | ReadsFilter% |
|---------------------|-------------------|------------------|------------------|--------------|
| MCF-7-TGF-beta      | 16944326          | 2.54E+09         | 14325019         | 0.845417     |
| MDA-MB-231-TGF-beta | 19599682          | 2.94E+09         | 15843096         | 0.808334     |
| MCF-7-blank         | 15975974          | 2.4E+09          | 13228362         | 0.828016     |
| MDA-MB-231-blank    | 25097748          | 3.76E+09         | 21858160         | 0.870921     |

Table S4 Mapping statistics of snoRNA from small RNA sequencing data.

| Sample name               | Mapped<br>reads | Mapped<br>rate | Unique<br>mapped<br>rate | AllBase  | MappedBase |
|---------------------------|-----------------|----------------|--------------------------|----------|------------|
| MCF-7-blank               | 3925210         | 0.297          | 0.175                    | 1.46E+09 | 2.71E+08   |
| MCF-7-TGF- $\beta$ 1      | 4060399         | 0.283          | 0.166                    | 1.62E+09 | 2.8E+08    |
| MDA-MB-231-blank          | 6563734         | 0.3            | 0.175                    | 2.45E+09 | 4.57E+08   |
| MDA-MB-231-TGF- $\beta$ 1 | 4775464         | 0.301          | 0.176                    | 1.74E+09 | 3.33E+08   |

Table S5 The commonly upregulated and downregulated snoRNA in both two breast cancer cells.

| MCF-7 TGF- $\beta$ -vs- control     |         |          |          |       |                         |                    |
|-------------------------------------|---------|----------|----------|-------|-------------------------|--------------------|
| snoRNA_id                           | log2FC  | p-value  | FDR      | Style | MCF-7-TGF- $\beta$      | MCF-7-control      |
| <i>SCARNA16</i><br>9                | -1.1758 | 0.000518 | 0.002038 | down  | 24.13556                | 54.51938           |
| <i>SNORD36B</i><br>3                | 0.85832 | 5.89E-06 | 3.06E-05 | up    | 156.1423                | 86.11004           |
| <i>SNORD4B</i><br>9                 | 0.71264 | 1.86E-13 | 1.91E-12 | up    | 567.9245                | 346.4783           |
| <i>SNORD92</i><br>4                 | -0.7962 | 1.30E-21 | 2.22E-20 | down  | 454.1426                | 788.4928           |
| <i>SNORD75</i><br>8                 | -0.9230 | 2.83E-24 | 5.07E-23 | down  | 366.4664                | 694.7399           |
| <i>SNORA44</i><br>8                 | 0.86243 | 7.21E-06 | 3.58E-05 | up    | 151.9555                | 83.56241           |
| <i>SNORA71A</i><br>5                | 1.16797 | 4.61E-27 | 8.69E-26 | up    | 530.736                 | 236.155            |
| MDA-MB-231 TGF- $\beta$ -vs-control |         |          |          |       |                         |                    |
| snoRNA_id                           | log2FC  | p-value  | FDR      | Style | MDA-MB-231-TGF- $\beta$ | MDA-MB-231-control |
| <i>SCARNA16</i><br>9                | 0.93744 | 0.00087  | 0.003059 | up    | 72.6631                 | 37.93572           |
| <i>SNORD36B</i><br>1                | 0.71069 | 6.01E-07 | 2.96E-06 | up    | 262.5923                | 160.427            |
| <i>SNORD92</i><br>6                 | -0.8168 | 1.92E-26 | 1.97E-25 | down  | 531.8855                | 936.8143           |

|                 |         |          |          |      |          |          |
|-----------------|---------|----------|----------|------|----------|----------|
| <i>SNORD4B</i>  | 0.73455 | 1.68E-12 | 1.17E-11 | up   | 495.6586 | 297.8488 |
| <i>SNORD75</i>  | -0.7591 | 6.03E-15 | 4.94E-14 | down | 337.9776 | 571.9306 |
| 3               |         |          |          |      |          |          |
| <i>SNORA44</i>  | 1.17572 | 9.24E-14 | 6.68E-13 | up   | 251.2845 | 111.2172 |
| 5               |         |          |          |      |          |          |
| <i>SNORA71A</i> | 1.54742 | 2.09E-52 | 3.36E-51 | up   | 689.5665 | 235.8799 |

Table S6 Mass spectrometry of *SNORA71A* pull down product. The “Entry name” shows the proteins may bind to *SNORA71A*.

| Entry name | MW [kDa] | calc. pI | Score Sequest<br>HT: Sequest HT | Abundances  |
|------------|----------|----------|---------------------------------|-------------|
| VIME       | 53.6     | 5.12     | 316.02                          | 5982715292  |
| K2C1       | 66       | 8.12     | 86.42                           | 268805169   |
| K2C8       | 53.7     | 5.59     | 120.24                          | 706769169.4 |
| K1C19      | 44.1     | 5.14     | 99.63                           | 807092933.3 |
| K2C7       | 51.4     | 5.48     | 77.68                           | 313299035   |
| K1C9       | 62       | 5.24     | 52.96                           | 127168872   |
| ACTB       | 41.7     | 5.48     | 61.27                           | 755298713   |
| K1C18      | 48       | 5.45     | 72.76                           | 461427116   |
| K1C10      | 58.8     | 5.21     | 67.97                           | 214261895.7 |
| K22E       | 65.4     | 8        | 49.84                           | 82188307.19 |
| ACTS       | 42       | 5.39     | 43.29                           | 1721404.125 |
| K1C14      | 51.5     | 5.16     | 48.47                           | 14553337.81 |
| K2C5       | 62.3     | 7.74     | 33.12                           | 15672340.31 |
| ATPB       | 56.5     | 5.4      | 21.89                           | 13541534.7  |
| HORN       | 282.2    | 10.04    | 17.91                           | 5945953.656 |
| PYC        | 129.6    | 6.84     | 31.43                           | 22774677.31 |
| ATPA       | 59.7     | 9.13     | 23.44                           | 22970567.56 |
| BASP1      | 22.7     | 4.63     | 15.81                           | 10889509.25 |
| K1C16      | 51.2     | 5.05     | 34.91                           | 5539770.875 |
| PLEC       | 531.5    | 5.96     | 24.2                            | 27959468    |
| EF1A1      | 50.1     | 9.01     | 24.25                           | 66832159.75 |
| ALBU       | 69.3     | 6.28     | 14.24                           | 131099441.6 |
| TBB4B      | 49.8     | 4.89     | 15.73                           | 17543150.69 |
| TBB5       | 49.6     | 4.89     | 15.5                            | 4842767.5   |

|       |       |       |       |             |
|-------|-------|-------|-------|-------------|
| DESM  | 53.5  | 5.27  | 23.83 | 880744.0938 |
| TBA1A | 50.1  | 5.06  | 10.87 | 24354244.78 |
| QCR2  | 48.4  | 8.63  | 10.37 | 9109867.766 |
| HLAA  | 40.9  | 6.99  | 6.06  | 1741575.359 |
| PDIA3 | 56.7  | 6.35  | 6.6   | 4496622.828 |
| K1C15 | 49.2  | 4.77  | 21.35 | 18354096    |
| KRT84 | 64.8  | 7.56  | 12.3  | 66234055.5  |
| K1C13 | 49.6  | 4.96  | 15.92 |             |
| ECHB  | 51.3  | 9.41  | 15.28 | 7279035.5   |
| DCD   | 11.3  | 6.54  | 7.72  | 6340932.813 |
| K2C80 | 50.5  | 5.67  | 7.55  | 3999653.813 |
| DHE3  | 61.4  | 7.8   | 4.03  | 1608998.563 |
| SQOR  | 49.9  | 9.11  | 4.92  | 1109074.063 |
| RINI  | 49.9  | 4.82  | 5.28  | 4206645.75  |
| SAM50 | 51.9  | 6.9   | 8.28  | 4291151.031 |
| HNRH1 | 49.2  | 6.3   | 2.73  | 1399073.125 |
| ODO2  | 48.7  | 8.95  | 5.88  | 2410648.75  |
| EF1G  | 50.1  | 6.67  | 3.9   | 1323564.328 |
| FLOT1 | 47.3  | 7.49  | 2.16  | 2018860.578 |
| CN37  | 47.5  | 9.07  | 2.53  | 317828.2188 |
| ENOA  | 47.1  | 7.39  | 4.65  | 2220025.563 |
| HS2ST | 41.9  | 8.69  | 4.11  | 1736456.594 |
| IF2G  | 51.1  | 8.4   | 2.54  | 749692.9688 |
| AATM  | 47.5  | 9.01  | 5.52  | 1078920.344 |
| FILA2 | 247.9 | 8.31  | 3.07  | 716156.3125 |
| PCCB  | 58.2  | 7.64  | 4.23  | 2480666.031 |
| HLAB  | 40.5  | 6.54  | 2.24  | 699673.25   |
| H4    | 11.4  | 11.36 | 5.3   | 1947346.125 |
| OST48 | 50.8  | 6.55  | 2.76  | 1639184.375 |

|       |       |       |      |             |
|-------|-------|-------|------|-------------|
| PRPC  | 17    | 4.84  | 0    | 617496.8125 |
| EIF3F | 37.5  | 5.45  | 2.21 | 122225.0234 |
| GLYM  | 56    | 8.53  | 2.12 | 1636909.375 |
| YBOX1 | 35.9  | 9.88  | 3.49 | 674846.125  |
| EFTU  | 49.5  | 7.61  | 3    | 2014765.5   |
| NEST  | 177.3 | 4.36  | 1.82 | 933833.3125 |
| HSP77 | 40.2  | 7.87  | 1.74 | 315987.625  |
| RL3   | 46.1  | 10.18 | 1.8  | 3274449.5   |
| ARP2  | 44.7  | 6.74  | 1.72 | 413454.3125 |
| PAIRB | 44.9  | 8.65  | 2.78 | 637975.3125 |
| G3BP2 | 54.1  | 5.55  | 2.14 | 413944.9688 |
| RL4   | 47.7  | 11.06 | 3.01 | 1449814.156 |
| CAVN1 | 43.5  | 5.6   | 0    | 904367.9688 |
| AP2M1 | 49.6  | 9.54  | 4.15 | 3008815.625 |
| SPTC1 | 52.7  | 6.01  | 2.16 | 326190.1563 |
| MCCB  | 61.3  | 7.68  | 3.94 | 784114.9688 |
| CATD  | 44.5  | 6.54  | 3.94 | 2756145.781 |
| ANT3  | 52.6  | 6.71  | 2.24 | 3205462.75  |
| H13   | 22.3  | 11.02 | 1.93 | 667675.25   |
| QCR1  | 52.6  | 6.37  | 2.44 | 1815183.094 |
| CALR  | 48.1  | 4.44  | 4.52 | 1248505.813 |
| PDIA6 | 48.1  | 5.08  | 2.01 | 404873.7813 |
| CD63  | 25.6  | 7.81  | 2.06 | 653748.8125 |
| THIM  | 41.9  | 8.09  | 0    | 592281      |
| DEF1  | 10.2  | 6.99  | 4.39 | 2433412.25  |
| APMAP | 46.5  | 6.16  | 0    | 469389.5625 |
| SCPDL | 47.1  | 9.14  | 3.63 | 722909.9531 |
| CCD47 | 55.8  | 4.87  | 0    | 157328.6875 |
| TXND5 | 47.6  | 5.97  | 2.07 | 766384.5    |

|       |       |      |      |             |
|-------|-------|------|------|-------------|
| ACACA | 265.4 | 6.37 | 0    |             |
| FUMH  | 54.6  | 8.76 | 1.75 |             |
| KRT85 | 55.8  | 6.55 | 1.82 | 14865685    |
| HBE   | 16.2  | 8.63 | 0    | 195763.3594 |
| HBA   | 15.2  | 8.68 | 0    | 211352.125  |
| DSG1  | 113.7 | 5.03 | 0    |             |
| SERPH | 46.4  | 8.69 | 2.02 | 566357.375  |
| IDHP  | 50.9  | 8.69 | 1.96 |             |
| G3BP1 | 52.1  | 5.52 | 0    | 283118.4063 |
| PGK2  | 44.8  | 8.54 | 2.5  | 455412.9688 |
| BGAL  | 76    | 6.57 | 1.82 |             |
| PREB  | 45.4  | 7.88 | 0    | 437904.6875 |
| STAB1 | 275.3 | 6.49 | 0    |             |
| SOAT1 | 64.7  | 8.94 | 0    | 243542.2031 |
| IF4A1 | 46.1  | 5.48 | 0    | 307952.4063 |
| SEMG1 | 52.1  | 9.29 | 0    | 634646.6875 |
| RL40  | 14.7  | 9.83 | 2.23 | 1680125.125 |
| CISY  | 51.7  | 8.32 | 1.86 | 1158121.625 |
| CP1B1 | 60.8  | 8.98 | 0    | 96157.98438 |
| GNAS1 | 111   | 5.03 | 0    | 321568.8438 |
| IGHA1 | 37.6  | 6.51 | 2.03 |             |
| DHC24 | 60.1  | 8.16 | 0    | 301191.75   |
| AL1A3 | 56.1  | 7.25 | 1.82 | 368203.7813 |
| APOA1 | 30.8  | 5.76 | 0    | 293616.3438 |
| DLDH  | 54.1  | 7.85 | 1.91 | 597813.625  |
| DX39A | 49.1  | 5.68 | 0    | 145334.2344 |
| TRFL  | 78.1  | 8.12 | 0    | 119599.6563 |
| RPGF2 | 167.3 | 6.67 | 0    | 267367.3125 |
| H2A2C | 14    | 10.9 | 0    | 628391.25   |

|       |       |      |      |             |
|-------|-------|------|------|-------------|
| SCMC1 | 53.3  | 6.33 | 2.2  | 821112.9375 |
| S10A7 | 11.5  | 6.77 | 1.71 |             |
| PRS8  | 45.6  | 7.55 | 0    |             |
| LAP2B | 50.6  | 9.38 | 0    | 174039.8125 |
| SYNE2 | 795.9 | 5.36 | 0    |             |
| GGNB2 | 79    | 6.38 | 0    | 846007.9375 |
| SYDC  | 57.1  | 6.55 | 0    | 103416.9688 |
| AGK   | 47.1  | 8.09 | 0    | 183342.0781 |
| SF3B1 | 145.7 | 7.09 | 0    |             |
| PCAT1 | 59.1  | 6.02 | 0    |             |
| NOE2  | 51.4  | 7.94 | 0    |             |
| KPRP  | 64.1  | 8.27 | 0    | 435403.2813 |
